# Supplementary material for: Feature Selection for the Interpretation of Antioxidant Mechanisms in Plant Phenolics
Source: Molecules. 2023 Feb 2;28(3):1454. doi: 10.3390/molecules28031454 (PMC9921549; doi:10.3390/molecules28031454)
Supplement: Supplementary file 1 [file molecules-28-01454-s001.zip › feature_importance.xlsx]

## Sheet: raw_importance
ORAC					SOAC
energy		polarity			energy		polarity
IP	LUMO	MolLogP	TPSA		IP	LUMO	MolLogP	TPSA
0.06	0.15	0.49	1.11		2.76	0.51	0.44	0.08
gap	BDE	dipole			gap	BDE	dipole
0.23	0.6	0.59			1.81	0.45	0.4
PA		MinPartialCharge	MaxPartialCharge		PA		MinPartialCharge	MaxPartialCharge
0.61		0.78	0.12		0.29		0.56	0.42
structure		steric properties			structure		steric properties
MinEStateIndex	MaxEStateIndex	FractionCSP3	LabuteASA		MinEStateIndex	MaxEStateIndex	FractionCSP3	LabuteASA
0.53	0.3	0.1	0.16		0.31	0.4	0.09	0.49
HallKierAlpha	BertzCT				HallKierAlpha	BertzCT
0.56	0.23				0.19	0.39
BalabanJ	FpDensityMorgan2​				BalabanJ	FpDensityMorgan2​
0.34	0.19				0.93	0.18
Max	Min				Max	Min
1.11	0.06				2.76	0.08
ABTS					MTT
energy		polarity			energy		polarity
IP	LUMO	MolLogP	TPSA		IP	LUMO	MolLogP	TPSA
0.18	0.18	0.12	0.51		0.05	0.04	0.03	0.12
gap	BDE	dipole			gap	BDE	dipole
0.26	0.48	0.11			0.03	0.3	0.08
PA		MinPartialCharge	MaxPartialCharge		PA		MinPartialCharge	MaxPartialCharge
0.28		0.24	0.29		0.1		0.05	0.04
structure		steric properties			structure		steric properties
MinEStateIndex	MaxEStateIndex	FractionCSP3	LabuteASA		MinEStateIndex	MaxEStateIndex	FractionCSP3	LabuteASA
0.28	0.68	0.28	0.09		0.07	0.05	0.02	0.05
HallKierAlpha	BertzCT				HallKierAlpha	BertzCT
0.94	0.1				0.02	0.04
BalabanJ	FpDensityMorgan2​				BalabanJ	FpDensityMorgan2​
0.12	0.16				0.06	0.21
Max	Min				Max	Min
0.94	0.09				0.3	0.02
DPPH
energy		polarity
IP	LUMO	MolLogP	TPSA
0.18	0.3	0.09	2.22
gap	BDE	dipole moment
1.97	0.9	0.15
PA		MinPartialCharge	MaxPartialCharge
0.39		0.09	1.6
structure		steric properties
MinEStateIndex	MaxEStateIndex	FractionCSP3	LabuteASA
1.87	0.67	1	0.19
HallKierAlpha	BertzCT
1.32	0.14
BalabanJ	FpDensityMorgan2​
2.06	0.38
Max	Min
2.22	0.09

## Sheet: scaled_importance
ORAC					SOAC
energy		polarity			energy		polarity
IP	LUMO	MolLogP	TPSA		IP	LUMO	MolLogP	TPSA
0	0.0857143	0.409524	1		1	0.160448	0.134328	0
gap	BDE	dipole			gap	BDE	dipole
0.161905	0.514286	0.504762			0.645522	0.13806	0.119403
PA		MinPartialCharge	MaxPartialCharge		PA		MinPartialCharge	MaxPartialCharge
0.52381		0.685714	0.0571429		0.0783582		0.179104	0.126866
structure		steric properties			structure		steric properties
MinEStateIndex	MaxEStateIndex	FractionCSP3	LabuteASA		MinEStateIndex	MaxEStateIndex	FractionCSP3	LabuteASA
0.447619	0.228571	0.0380952	0.0952381		0.0858209	0.119403	0.00373134	0.152985
HallKierAlpha	BertzCT				HallKierAlpha	BertzCT
0.47619	0.161905				0.0410448	0.115672
BalabanJ	FpDensityMorgan2​				BalabanJ	FpDensityMorgan2​
0.266667	0.12381				0.317164	0.0373134
ABTS					MTT
energy		polarity			energy		polarity
IP	LUMO	MolLogP	TPSA		IP	LUMO	MolLogP	TPSA
0.105882	0.105882	0.0352941	0.494118		0.107143	0.0714286	0.0357143	0.357143
gap	BDE	dipole			gap	BDE	dipole
0.2	0.458824	0.0235294			0.0357143	1	0.214286
PA		MinPartialCharge	MaxPartialCharge		PA		MinPartialCharge	MaxPartialCharge
0.223529		0.176471	0.235294		0.285714		0.107143	0.0714286
structure		steric properties			structure		steric properties
MinEStateIndex	MaxEStateIndex	FractionCSP3	LabuteASA		MinEStateIndex	MaxEStateIndex	FractionCSP3	LabuteASA
0.223529	0.694118	0.223529	0		0.178571	0.107143	0	0.107143
HallKierAlpha	BertzCT				HallKierAlpha	BertzCT
1	0.0117647				0	0.0714286
BalabanJ	FpDensityMorgan2​				BalabanJ	FpDensityMorgan2​
0.0352941	0.0823529				0.142857	0.678571
DPPH
energy		polarity
IP	LUMO	MolLogP	TPSA
0.0422535	0.0985915	0	1
gap	BDE	dipole
0.882629	0.380282	0.028169
PA		MinPartialCharge	MaxPartialCharge
0.140845		0	0.70892
structure		steric properties
MinEStateIndex	MaxEStateIndex	FractionCSP3	LabuteASA
0.835681	0.2723	0.42723	0.0469484
HallKierAlpha	BertzCT
0.577465	0.0234742
BalabanJ	FpDensityMorgan2​
0.924883	0.13615
